# Supplementary material
Source: PubMed Central journal article supplement (PMC8099149)
Supplement: NIHMS1639856-supplement-Supplemental_Procedures.pdf [file NIHMS1639856-supplement-Supplemental_Procedures.pdf]

## 1 **SUPPLEMENTAL METHODS**

### 2 **Animal model**

3 The adolescent Yucatan minipig model was selected for this study as it exhibits various features of  
4 human knee joints.<sup>5</sup> The Yucatan minipig has been shown to develop macroscopic cartilage lesions  
5 consistent with posttraumatic osteoarthritis (PTOA) within one year following ACL transection.<sup>3</sup> The  
6 cartilage damage typically develops in the medial compartment with more pronounced damage at  
7 areas adjacent to the tibial spine,<sup>3</sup> consistent with the damage observed in human patients following  
8 ACL reconstruction surgery.<sup>4</sup> Furthermore, the Yucatan minipig model has also been shown to  
9 develop other non-cartilaginous features of PTOA, such as an early synovitis along with  
10 accompanying changes in protein markers of extracellular matrix breakdown.<sup>6</sup> The genetic<sup>8</sup> and  
11 pharmacokinetic<sup>7</sup> similarities between the porcine model and humans further support the use of the  
12 Yucatan minipig ACL transection model to study PTOA.

### 14 **Housing and husbandry**

15 Following delivery to the animal care facility, all animals underwent a minimum of a 7-day quarantine  
16 and stabilization period. The pigs were housed in single cages (a minimum of 22.5 ft<sup>2</sup>) with wood  
17 chips over the concrete floor. All pigs were housed in pens that were adjacent to pens housing other  
18 pigs. Pigs were allowed to ambulate at all times. Animals were fed at several scheduled times per day.  
19 However, food was withheld a minimum of 12 hours before surgery and before euthanasia. No  
20 animals were excluded from the study and no modifications to the approved protocol were necessary  
21 over the course of the study. The animals were not used in any previous study and were considered  
22 healthy via veterinarian examination upon arrival and the joints determined to be normal via intra-  
23 operative assessment.

### 25 **Anesthesia**

26 Anesthesia was induced using Telazol (4 mg/Kg) and Xylazine (2 mg/kg) followed by Propofol (3-7  
27 mg/kg) and then maintained with Isoflurane (1-3 MAC) following intubation. Eyes were protected  
28 using an eye lubricant. Both limbs were shaved and scrubbed with Chlorhexidine and 70% alcohol

29 until visibly clean, followed by a ten-minute evaporation period. Hoofs were covered with unsterile  
 30 gloves. Animals were then transferred into the adjacent operating room, placed supine on a heating  
 31 mat, and secured on the operation table. Animal health and anesthesia depth were maintained by  
 32 monitoring respiratory rate, oxygen saturation, electrocardiogram, blood pressure, and body  
 33 temperature. The surgical limb and ipsilateral lower body were then scrubbed three times using  
 34 Betadine. Hoofs were covered with a sterile glove and secured using a sterile elastic wrap. One layer  
 35 of sterile towels was placed around the surgical area, followed by a layer of sterile drapes, leaving  
 36 only the surgical limb exposed during the procedure.

37 Prior to euthanasia, anesthesia was induced and maintained similar to that used for the surgical  
 38 procedures. Animals were euthanized during deep anesthesia using an intravenous injection of a  
 39 solution containing pentobarbital sodium and phenytoin sodium (Beuthanasia-D, 0.1ml/kg). Death was  
 40 confirmed by a veterinarian technician by the absence of blood pressure and heart sounds prior to  
 41 obtaining the tissue samples.

42

43 **Analgesia and Peri-operative care**

44

45

| Drug                            | Dose      |     | Route                        | Frequency of application (times/day) | Duration (days) |
|---------------------------------|-----------|-----|------------------------------|--------------------------------------|-----------------|
|                                 | mg/kg     | ml  |                              |                                      |                 |
| Buprenorphine                   | 0.01      |     | Intramuscular                | Once, pre-op                         | 1               |
| Fentanyl Patch                  | 2ug/kg/hr |     | Transdermal                  | Once, pre-op                         | 3               |
| Ceftiofur                       | 5         |     | Intramuscular                | Once, pre-op                         | 1               |
| 0.5% Bupivacaine + 2% Lidocaine |           | 1.0 | Subcutaneous around wound    | Once, post-op                        | 1               |
| Ondansetron                     | 4         |     | Intramuscular or Intravenous | Once, post-op                        | 1               |
| Tylenol elixir                  | 10-15     |     | Orally                       | Every 6 hours                        | As needed       |

46

47

48 **Surgical Procedures**

49 *ACL transection*

50 A medial arthrotomy was created and the fat-pad partially resected to expose the ACL. The

51 ACL was cut between the proximal and middle thirds of the ligament. A Lachman test was performed  
52 to verify complete transection. The knee was then irrigated with 500 cc of normal saline. For those  
53 animals assigned to receive no treatment, the incision was then closed in layers,<sup>3</sup> and the ligament was  
54 allowed to heal naturally.

55

#### 56 *ACL reconstruction*

57 Following ACL transection in the animals assigned to the ACL reconstruction group, fresh-  
58 frozen BPTB allografts, which were harvested from age, weight, and gender matched donors, were  
59 implanted as previously described.<sup>3</sup> The entire patellar tendon (~10 mm in width) was used for the soft  
60 tissue portion of the graft while the bone plugs were trimmed to 7 mm diameter. Femoral graft fixation  
61 was achieved with a 6x20 mm bio-absorbable interference screw (Biosure; Smith & Nephew, Andover,  
62 MA). The graft was manually pre-conditioned in tension twenty times and firmly tensioned with the  
63 knee in maximal extension (~30° for the pig). The distal block was secured in the tibia using a second 6  
64 mm interference screw backed up with an extracortical tibial button. All incisions were closed in layers.

65

#### 66 *Bridge-enhanced ACL repair*

67 For the animals assigned to the bio-enhanced ACL repair group, the repair was performed  
68 following ACL transection as previously described.<sup>3</sup> In brief, an Endobutton carrying three looped  
69 sutures was passed thru a 4 mm femoral tunnel and flipped. Two of the sutures were threaded through  
70 the scaffold, into a predrilled tibial tunnel and fixed extracortically using a button with the knee in  
71 maximum extension. The remaining suture was tied to a Kessler suture of #1 Vicryl (Ethicon,  
72 Somerville, NJ), which had been placed in the tibial stump of the ACL. Three cubic centimeters of  
73 autologous blood were used to saturate and activate the scaffold. The scaffold-blood composite was  
74 allowed to set for a minimum of 10 minutes before completion. All incisions were closed in layers.

75

#### 76 **Sample Size Justification**

77 Our primary outcome variables were the OARSI macroscopic damage scores<sup>2</sup> and the gait  
78 parameters. Based on previous work, significant differences in the macroscopic damage score were

79 found between the three treatment groups with a sample size of 8 animals per group.<sup>3</sup> Therefore the *a*  
80 *priori* power analysis was driven by the ratio of the maximum force between the surgical and control  
81 hindlimbs from an ACL transection study in rats.<sup>1</sup> It was determined that a sample size of 12 animals  
82 per group would be more than 80% powered to detect a between surgical to contralateral limb difference  
83 of 0.18 based on within-group standard deviation of 0.15.

84 .

## REFERENCES

- 85 1. Jay GD, Elsaid KA, Kelly KA, et al. Prevention of cartilage degeneration and gait asymmetry  
86 by lubricin tribosupplementation in the rat following anterior cruciate ligament transection. *Arthritis*  
87 *Rheum.* 2012;64:1162-1171.
- 88 2. Little CB, Smith MM, Cake MA, Read RA, Murphy MJ, Barry FP. The OARSI  
89 histopathology initiative - recommendations for histological assessments of osteoarthritis in sheep and  
90 goats. *Osteoarthritis Cartilage.* 2010;18 Suppl 3:S80-92.
- 91 3. Murray MM, Fleming BC. Use of a bioactive scaffold to stimulate anterior cruciate ligament  
92 healing also minimizes posttraumatic osteoarthritis after surgery. *Am J Sports Med.* 2013;41:1762-  
93 1770.
- 94 4. Okafor EC, Utturkar GM, Widmyer MR, et al. The effects of femoral graft placement on  
95 cartilage thickness after anterior cruciate ligament reconstruction. *J Biomech.* 2014;47:96-101.
- 96 5. Proffen BL, McElfresh M, Fleming BC, Murray MM. A comparative anatomical study of the  
97 human knee and six animal species. *Knee.* 2012;19:469-476.
- 98 6. Sieker JT, Ayturk UM, Proffen BL, Weissenberger MH, Kiapour AM, Murray MM.  
99 Immediate administration of intraarticular triamcinolone acetonide after joint injury modulates  
100 molecular outcomes associated with early synovitis. *Arthritis Rheumatol.* 2016;68:1637-1647.
- 101 7. Swindle MM, Makin A, Herron AJ, Clubb FJ, Jr., Frazier KS. Swine as models in biomedical  
102 research and toxicology testing. *Vet Pathol.* 2012;49:344-356.
- 103 8. Wernersson R, Schierup MH, Jorgensen FG, et al. Pigs in sequence space: a 0.66X coverage  
104 pig genome survey based on shotgun sequencing. *BMC Genomics.* 2005;6:70.
