# Supplementary material
Source: PubMed Central journal article supplement (PMC8099149)
Supplement: NIHMS1639856-supplement-Supplemental_Tables.pdf [file NIHMS1639856-supplement-Supplemental_Tables.pdf]

**Supplemental Table S1:** Gait analysis data with adjusted P-values for all comparisons. Adjusted p values less than .05 in bold, and those between .05 and .10 in bold italics.

|                            | ACLT      | ACLR      | BE-R      | P-value (P-adj) |              |              |
|----------------------------|-----------|-----------|-----------|-----------------|--------------|--------------|
|                            | Sx/Contra | Sx/Contra | Sx/Contra | ACLT vs ACLR    | ACLT vs BE-R | ACLR vs BE-R |
| <b>Maximum Force (%BW)</b> |           |           |           |                 |              |              |
| Pre-op                     | 1.01±0.08 | 1.01±0.06 | 1.03±0.08 | 1               | 1            | 1            |
| 4 weeks                    | 0.73±0.12 | 0.65±0.14 | 0.55±0.15 | 0.18            | <b>0.003</b> | 0.18         |
| 12 weeks                   | 0.97±0.13 | 0.88±0.14 | 0.89±0.1  | 0.26            | 0.26         | 0.85         |
| 26 weeks                   | 0.98±0.07 | 0.97±0.11 | 0.91±0.09 | 0.78            | <b>0.07</b>  | 0.25         |
| 52 weeks                   | 1.01±0.09 | 1.00±0.12 | 0.89±0.12 | 0.7             | <b>0.02</b>  | <b>0.07</b>  |
| <b>Impulse(%BW)</b>        |           |           |           |                 |              |              |
| Pre-op                     | 1.03±0.09 | 1.03±0.11 | 1.03±0.11 | 1               | 1            | 1            |
| 4 weeks                    | 0.72±0.11 | 0.59±0.15 | 0.52±0.19 | <b>0.03</b>     | <b>0.003</b> | 0.31         |
| 12 weeks                   | 0.95±0.13 | 0.90±0.13 | 0.93±0.12 | 1               | 1            | 1            |
| 26 weeks                   | 1.00±0.07 | 0.96±0.10 | 0.93±0.1  | 0.47            | 0.14         | 0.47         |
| 52 weeks                   | 1.03±0.09 | 0.98±0.08 | 0.91±0.1  | 0.21            | <b>0.01</b>  | <b>0.09</b>  |
| <b>Max Peak Pressure</b>   |           |           |           |                 |              |              |
| Pre-op                     | 1.02±0.12 | 1.00±0.12 | 1.03±0.07 | 1               | 1            | 1            |
| 4 weeks                    | 1.05±0.21 | 0.95±0.12 | 0.88±0.11 | 0.2             | <b>0.03</b>  | 0.2          |
| 12 weeks                   | 0.97±0.06 | 0.95±0.12 | 1±0.12    | 0.88            | 0.88         | 0.88         |
| 26 weeks                   | 1.03±0.14 | 0.97±0.08 | 1±0.1     | 0.38            | 0.79         | 0.79         |
| 52 weeks                   | 0.99±0.12 | 1.01±0.11 | 1.01±0.09 | 1               | 1            | 1            |
| <b>Stance time</b>         |           |           |           |                 |              |              |
| Pre-op                     | 1.01±0.06 | 0.98±0.06 | 1.02±0.10 | 0.37            | 0.8          | 0.37         |
| 4 weeks                    | 0.96±0.06 | 0.89±0.06 | 0.87±0.11 | <b>0.03</b>     | <b>0.05</b>  | 0.66         |
| 12 weeks                   | 0.98±0.05 | 0.99±0.08 | 1.00±0.08 | 1               | 1            | 1            |
| 26 weeks                   | 1.02±0.06 | 0.98±0.08 | 1.01±0.04 | 0.33            | 0.71         | 0.33         |
| 52 weeks                   | 1.03±0.05 | 1.00±0.09 | 1.01±0.04 | 1               | 1            | 1            |
| <b>Stride time</b>         |           |           |           |                 |              |              |
| Pre-op                     | 0.99±0.06 | 1.00±0.04 | 0.99±0.05 | 1               | 1            | 1            |
| 4 weeks                    | 1.03±0.1  | 1.01±0.04 | 1.02±0.04 | 0.63            | 0.75         | 0.75         |
| 12 weeks                   | 0.99±0.02 | 1.01±0.03 | 1.00±0.02 | 0.28            | 0.63         | 0.63         |
| 26 weeks                   | 1.00±0.02 | 1.01±0.03 | 0.99±0.03 | 0.4             | 0.56         | 0.4          |
| 52 weeks                   | 0.99±0.03 | 1.01±0.02 | 0.99±0.03 | 0.12            | 0.79         | 0.12         |
| <b>Stride length</b>       |           |           |           |                 |              |              |
| Pre-op                     | 1.01±0.02 | 1.00±0.03 | 0.99±0.04 | 0.87            | 0.68         | 0.87         |
| 4 weeks                    | 1.00±0.05 | 1.01±0.03 | 1.02±0.05 | 0.97            | 0.97         | 0.97         |
| 12 weeks                   | 0.99±0.01 | 1±0.02    | 1.00±0.03 | 0.54            | 0.53         | 0.63         |
| 26 weeks                   | 1.01±0.02 | 1.00±0.02 | 0.99±0.03 | 0.74            | 0.36         | 0.45         |
| 52 weeks                   | 0.99±0.03 | 0.99±0.03 | 1.01±0.03 | 0.89            | 0.73         | 0.73         |
| <b>Stride velocity</b>     |           |           |           |                 |              |              |

|          |           |           |           |      |      |             |
|----------|-----------|-----------|-----------|------|------|-------------|
| Pre-op   | 1.01±0.06 | 1.00±0.04 | 1.01±0.04 | 1    | 1    | 1           |
| 4 weeks  | 0.98±0.05 | 1.00±0.04 | 1.00±0.05 | 1    | 1    | 1           |
| 12 weeks | 1.00±0.02 | 0.99±0.02 | 1.01±0.03 | 0.55 | 0.87 | 0.55        |
| 26 weeks | 1.01±0.03 | 0.99±0.03 | 1.00±0.03 | 0.59 | 0.9  | 0.9         |
| 52 weeks | 1.00±0.04 | 0.98±0.04 | 1.01±0.04 | 0.38 | 0.38 | <b>0.07</b> |

1

**Supplemental Data Table S2:** Macroscopic Damage Data with P-values for the between group (ACLT vs ACLR vs BE-R) and between knees (Sx vs Contralateral) comparisons.

|                         | ACLT     |          | ACLR      |           | BE-R     |          | P-value (P-adj) |                     |                      | P-value (P-adj)<br>Sx vs Contralateral |                  |                |
|-------------------------|----------|----------|-----------|-----------|----------|----------|-----------------|---------------------|----------------------|----------------------------------------|------------------|----------------|
|                         | Sx       | Contra   | Sx        | Contra    | Sx       | Contra   | ACLT vs<br>ACLR | ACLT vs<br>BE-R     | ACLR vs<br>BE-R      | ACLT                                   | ACLR             | BE-R           |
| Total Macroscopic Score | 7.8±2.79 | 1.8±1.27 | 7.5±2.68  | 1.4 ±2.68 | 4.8±3.04 | 1.9±1.24 | .77<br>(.77)    | <b>.02</b><br>(.06) | <b>.03</b><br>(0.06) | <.001<br>(<.01)                        | <.001<br>(<.001) | .006<br>(.006) |
| Medial Femoral Condyle  | 1.5±1.31 | 1.2±0.83 | 2.0±1.53  | 0.7±0.984 | 1.7±1.44 | 1.0±0.60 | .38<br>(1.00)   | .75<br>(1.00)       | .57<br>(1.00)        | .40<br>(.40)                           | .003<br>(.01)    | .14<br>(.28)   |
| Lateral Femoral Condyle | 2.2±1.03 | 0.3±0.45 | 1.1±1.16  | 0.1±0.289 | 0.7±0.99 | 0.2±0.39 | .03<br>(.05)    | .004<br>(.01)       | .34<br>(.34)         | <.001<br>(<.001)                       | .01<br>(.02)     | .12<br>(.12)   |
| Medial Tibial Plateau   | 1.6±0.42 | 0.4±0.67 | 2.1±1.38  | 0.5±0.674 | 0.7±0.67 | 0.7±0.65 | .31<br>(.31)    | 0.01<br>(.03)       | .002<br>(.006)       | .002<br>(.005)                         | .003<br>(.006)   | 1.00<br>(1.00) |
| Lateral Tibial Plateau  | 1.8±0.94 | 0.3±0.45 | 2.1±0.79  | 0.2±0.793 | 1.6±1.08 | 0.1±0.29 | .47<br>(.94)    | .53<br>(.94)        | .19<br>(.58)         | <.001<br>(.005)                        | <.001<br>(<.001) | .006<br>(.006) |
| Trochlea                | 3.2±1.19 | 0±0      | 3.0±1.35  | 0.3±0.888 | 2.6±1.68 | 0.6±1.19 | .74<br>(.98)    | .31<br>(.94)        | .49<br>(.98)         | <.001<br>(<.001)                       | <.001<br>(<.001) | .007<br>(.007) |
| Patella                 | 0.1±0.29 | 0±0      | 0.08±0.29 | 0±0       | 0.4±1.00 | 0.3±0.88 | 1.00<br>(1.00)  | .37<br>(1.00)       | .37<br>(1.00)        | n/a                                    | n/a              | .30<br>(.31)   |

**Supplemental Table S3:** Microscopic Cartilage Assessments with P-values for the between group (ACLT vs ACLR vs BE-R) and between knees (Sx vs Contralateral) comparisons.

|                                        | ACLT       |            | ACLR       |            | BE-R       |            | P-value (P-adj) |                 |                 | P-value (P-adj)<br>Sx vs Contralateral |                  |                |
|----------------------------------------|------------|------------|------------|------------|------------|------------|-----------------|-----------------|-----------------|----------------------------------------|------------------|----------------|
|                                        | Sx         | Contra     | Sx         | Contra     | Sx         | Contra     | ACLT vs<br>ACLR | ACLT<br>vs BE-R | ACLR vs<br>BE-R | ACLT                                   | ACLR             | BE-R           |
| <b>OARSI score</b>                     | 5.3±4.59   | 3.4±4.46   | 8.7±5.63   | 1.8±1.47   | 8.6±5.96   | 3.8±3.93   | 0.09<br>(0.26)  | 0.12<br>(0.26)  | 0.94<br>(0.94)  | .28<br>(.28)                           | <.001<br>(<.001) | .02<br>(.04)   |
| Structure                              | 2.2±2.17   | 1.8 ±2.69  | 4.3±2.67   | 0.92±1.38  | 4.3±2.90   | 1.8±2.14   | 0.04<br>(0.11)  | 0.05<br>(0.11)  | 0.97<br>(0.97)  | .69<br>(.69)                           | <0.001<br>(.002) | .008<br>(.02)  |
| Cloning                                | 1.8±1.42   | 0.7±0.49   | 2.2±1.34   | 0.83±0.39  | 2.0±1.28   | 0.8±0.58   | 0.45<br>(1.00)  | 0.64<br>(1.00)  | 0.75<br>(1.00)  | .007<br>(.007)                         | .001<br>(.004)   | .004<br>(.008) |
| Cell density                           | 0.8±0.866  | 0.5±1.00   | 1.3±1.06   | 0.08±0.29  | 1.3±1.22   | 0.5 ±0.67  | 0.20<br>(0.59)  | 0.23<br>(0.59)  | 0.99<br>(0.99)  | .51<br>(.51)                           | .01<br>(.04)     | .07<br>(.15)   |
| GAG                                    | 0.6±0.90   | 0.6±0.90   | 1.0±1.54   | 0±0        | 1.1±1.44   | 0.7±1.37   | 0.43<br>(1.00)  | 0.34<br>(1.00)  | 0.90<br>(1.00)  | .68<br>(.92)                           | n/a              | .46<br>(.92)   |
| Tidemark                               | 0±0        | 0±0        | 0±0        | 0±0        | 0±0        | 0±0        | n/a             | n/a             | n/a             | n/a                                    | n/a              | n/a            |
| Safranin-O<br>staining-MFC             | 38.4±6.4   | 34.9±9.7   | 32.9±8.5   | 38.0±8.2   | 36.2±7.6   | 32.9±11.0  | 0.07<br>(0.22)  | 0.43<br>(0.61)  | 0.31<br>(0.61)  | .14<br>(.35)                           | .12<br>(.35)     | .19<br>(.35)   |
| Cell density –<br>MFC<br>(cells/µm2)   | 0.42±0.096 | 0.43±0.110 | 0.48±0.069 | 0.51±0.126 | 0.44±0.098 | 0.45±0.105 | 0.08<br>(0.23)  | 0.60<br>(0.60)  | 0.29<br>(0.58)  | .88<br>(1.00)                          | .49<br>(1.00)    | .83<br>(1.00)  |
| Mediolateral<br>cell position -<br>MFC | 38.8±10.0  | 41.2±8.8   | 44.7±5.6   | 43.8±9.6   | 42.5±5.8   | 44.0±6.8   | 0.31<br>(0.94)  | 0.35<br>(0.94)  | 0.93<br>(0.93)  | .90<br>(1.00)                          | .53<br>(1.00)    | .56<br>(1.00)  |

**Supplemental Table S4:** Histological Synovitis Assessments with P-values for the between group (ACLT vs ACLR vs BE-R) and between knees (Sx vs Contralateral) comparisons.

|                            | ACLT     |          | ACLR     |          | BE-R     |           | P-value (P-adj) |                 |                 | P-value (P-adj)<br>Sx vs Contralateral |                |               |
|----------------------------|----------|----------|----------|----------|----------|-----------|-----------------|-----------------|-----------------|----------------------------------------|----------------|---------------|
|                            | Sx       | Contra   | Sx       | Contra   | Sx       | Contra    | ACLT vs<br>ACLR | ACLT<br>vs BE-R | ACLR vs<br>BE-R | ACLT                                   | ACLR           | BE-R          |
| Synovial Lining            | 0.6±0.52 | 0.3±0.49 | 0.7±0.49 | 0.5±0.52 | 0.8±0.45 | 0.6±0.67  | .68<br>(1.00)   | .40<br>(1.00)   | .66<br>(1.00)   | .18<br>(.55)                           | .42<br>(.84)   | .49<br>(.84)  |
| Synovial Cell<br>Density   | 1.1±0.51 | 0.3±0.45 | 0.9±0.67 | 0.3±0.45 | 1.0±0.43 | 0.3 ±0.45 | .48<br>(1.00)   | .65<br>(1.00)   | .71<br>(1.00)   | .005<br>(.01)                          | .01<br>(.03)   | .01<br>(.03)  |
| Inflammatory<br>Infiltrate | 1.2±0.39 | 0.9±0.29 | 1.0±0.43 | 1.0±0.43 | 0.9±0.52 | 1.0±0.00  | .31<br>(.61)    | .18<br>(.54)    | .66<br>(.66)    | .05<br>(.15)                           | 1.00<br>(1.00) | .57<br>(1.00) |
| Synovitis Sum<br>Score     | 2.8±0.72 | 1.5±0.67 | 2.6±0.79 | 1.8±0.75 | 2.6±0.98 | 2.0±0.85  | .41<br>(1.00)   | .63<br>(1.00)   | .81<br>(1.00)   | <.001<br>(<.001)                       | .004<br>(.007) | .06<br>(.06)  |
